# Supplementary material
Source: publisher figshare collection journal article supplement (https://brill.figshare.com/articles/dataset/_/18692798)
Supplement: Supplementary file 1 [file 1]

## **Anomalous pigmentation in American primates: Review and first record of a Leucistic Black Howler Monkey in Southeast Mexico**

Jorge Ramos-Luna<sup>a</sup>, María Fernanda Alvarez-Velazquez<sup>a</sup>, Colin A. Chapman<sup>b,c,d,e</sup>, Juan Carlos Serio-Silva<sup>a,\*</sup>

<sup>a</sup>Grupo de Estudios Transdisciplinarios en Primatología, Red de Biología y Conservación de Vertebrados, Instituto de Ecología, Xalapa, Veracruz, México

<sup>b</sup>Wilson Center, 1300 Pennsylvania Avenue NW, Washington, DC 20004, USA

<sup>c</sup>Department of Anthropology, George Washington University, Washington, DC 20052, USA

<sup>d</sup>School of Life Sciences, University of KwaZulu-Natal, Pietermaritzburg, 3209, South Africa

<sup>e</sup>Shaanxi Key Laboratory for Animal Conservation, Northwest University, Xi'an, 710069, China

\*Corresponding author; e-mail: [juan.serio@inecol.mx](mailto:juan.serio@inecol.mx)

ORCID iDs: Chapman: 0000-0002-8827-8140; Serio-Silva: 0000-0002-0582-2041

**Supplementary material**

**Table S1.**

| Species                                           | Anomalous pigmentation | n | Country    | Region          | Year | Social media platform | Evidence provided | Hyperlink                                                      |
|---------------------------------------------------|------------------------|---|------------|-----------------|------|-----------------------|-------------------|----------------------------------------------------------------|
| Atelidae                                          |                        |   |            |                 |      |                       |                   |                                                                |
| <i>Alouatta palliata</i> (Gray, 1849)             | Leucism                | 1 | Costa Rica | Caño negro      | 2019 | Facebook              | Photographic      | <a href="https://bit.ly/3zKFFVf">https://bit.ly/3zKFFVf</a>    |
|                                                   | Leucism                | 1 | Costa Rica | Caño negro      | 2020 | Facebook              | Photographic      | <a href="https://bit.ly/2VdPs70">https://bit.ly/2VdPs70</a>    |
|                                                   | Leucism                | 1 | Costa Rica | Upala           | 2020 | Facebook              | Anecdotal         | <a href="https://bit.ly/2VdPs70">https://bit.ly/2VdPs70</a> ** |
|                                                   | Leucism                | 1 | Costa Rica | Isla Chira      | 2020 | Facebook              | Anecdotal         | <a href="https://bit.ly/2VdPs70">https://bit.ly/2VdPs70</a> ** |
|                                                   | Leucism                | 1 | Costa Rica | Caño negro      | 2019 | Facebook              | Photographic      | <a href="https://bit.ly/3mXEsX0">https://bit.ly/3mXEsX0</a>    |
|                                                   | Leucism                | 1 | Costa Rica | Undisclosed     | 2014 | Facebook              | Photographic      | <a href="https://bit.ly/3teXoS4">https://bit.ly/3teXoS4</a>    |
|                                                   | Leucism                | 1 | Costa Rica | Caño negro      | 2019 | Facebook              | Photographic      | <a href="https://bit.ly/3mZIAWs">https://bit.ly/3mZIAWs</a>    |
|                                                   | Piebaldism             | 1 | Costa Rica | OET La selva    | 2014 | Facebook              | Photographic      | <a href="https://bit.ly/3tfOwLV">https://bit.ly/3tfOwLV</a>    |
|                                                   | Leucism                | 1 | Costa Rica | Caño negro      | 2014 | Facebook              | Photographic      | <a href="https://bit.ly/3jJbwjg">https://bit.ly/3jJbwjg</a>    |
|                                                   | Leucism                | 1 | Costa Rica | Sarapiquí       | 2016 | Facebook              | Photographic      | <a href="https://bit.ly/3DQRT14">https://bit.ly/3DQRT14</a>    |
|                                                   | Leucism                | 1 | Costa Rica | Alajuela        | 2021 | Instagram             | Photographic      | <a href="https://bit.ly/3teRssk">https://bit.ly/3teRssk</a>    |
| <i>Alouatta palliata mexicana</i> (Merriam, 1902) | Albinism               | 2 | Mexico     | Uxpanapa        | 2018 | Facebook              | Anecdotal         | <a href="https://bit.ly/3teRsZm">https://bit.ly/3teRsZm</a>    |
| <i>Ateles geoffroyi</i> (Kuhl, 1820)              | Leucism                | 1 | Costa Rica | Undisclosed     | 2021 | Facebook              | Video             | <a href="https://bit.ly/3BDRSLV">https://bit.ly/3BDRSLV</a>    |
|                                                   | Albinism               |   | Honduras   | Catamacas       | 2021 | Facebook              | Photographic      | <a href="https://bit.ly/3yOGSJI">https://bit.ly/3yOGSJI</a>    |
| <i>Ateles hybridus</i> (Geoffroy, 1829)           | Leucism                | 1 | Colombia   | Magdalena River | 2018 | Facebook              | Photographic      | <a href="https://bit.ly/3n0xYqn">https://bit.ly/3n0xYqn</a>    |
| Callitrichidae                                    |                        |   |            |                 |      | Facebook              |                   |                                                                |
| <i>Callithrix</i> sp. (Erxleben, 1777)*           | Leucism                | 1 | Brazil     | Captivity       | 2020 | Instagram             | Photographic      | <a href="https://bit.ly/3BEKO1y">https://bit.ly/3BEKO1y</a>    |

|                                                |         |   |        |           |      |           |              |                                                             |
|------------------------------------------------|---------|---|--------|-----------|------|-----------|--------------|-------------------------------------------------------------|
| <i>Callithrix jacchus</i> (Linnaeus, 1758)*    | Leucism | 1 | Brazil | Captivity | 2021 | Instagram | Photographic | <a href="https://bit.ly/3yLaCHw">https://bit.ly/3yLaCHw</a> |
| Cebidae                                        |         |   |        |           |      |           |              |                                                             |
| <i>Cebus capucinus imitator</i> (Thomas, 1903) | Leucism | 1 | Panama | Coiba     | 2015 | Twitter   | Photographic | <a href="https://bit.ly/3yOGVFo">https://bit.ly/3yOGVFo</a> |
| <i>Saimiri boliviensis</i> (Geoffroy, 1824)    | Leucism | 1 | Peru   | Limala    | 2015 | Facebook  | Photographic | <a href="https://bit.ly/3DL7AGN">https://bit.ly/3DL7AGN</a> |

---

\*Observation in captivity.

\*\*Anecdotal report on comment section.
